# Supplementary material
Source: Elsevier journal article supplement (https://www.sciencedirect.com/science/article/pii/S1885585717305960)

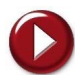

## Supplementary material

### Early Sacubitril/Valsartan-driven Benefit on Exercise Capacity in Heart Failure With Reduced Ejection Fraction: A Pilot Study

#### SUPPLEMENTARY MATERIAL

**Figure 1 of the supplementary material.** Flowchart for patient inclusion and follow-up. ACEI/ARB, angiotensin-converting enzyme inhibitor/angiotensin receptor blocker; CPET, cardiopulmonary exercise testing; HF, heart failure; LVEF, left ventricular ejection fraction; NYHA, New York Heart Association functional class.

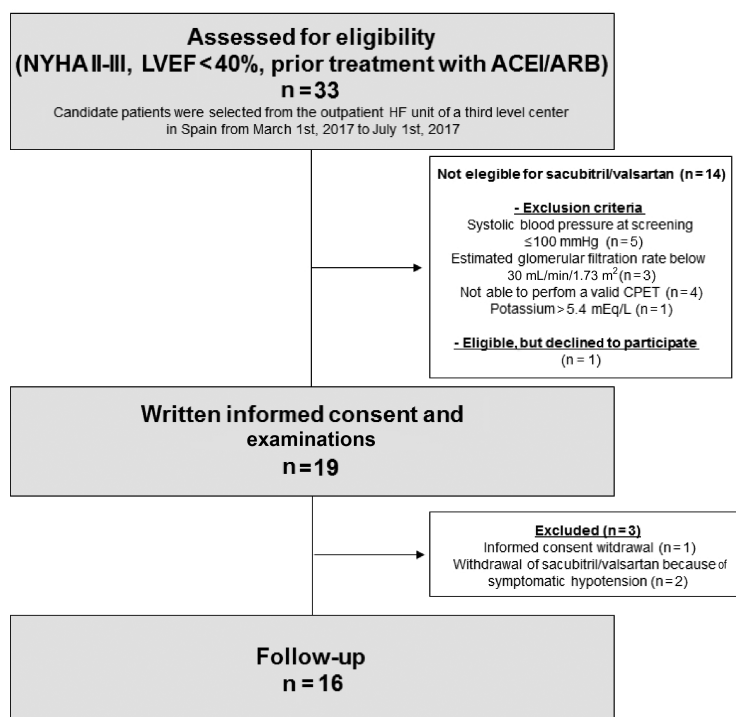

**Figure 2 of the supplementary material.** Thirty-day effects of sacubitril/valsartan on quality of life, NT-proBNP and renal function. A: changes of MLHF. B: changes of log of NT-proBNP. C: changes of estimated glomerular filtration rate. eGFR, estimated glomerular filtration rate using the Modification of Diet in Renal Disease formula; MLHF, Minnesota Living with Heart Failure Questionnaire; NT-proBNP, N-terminal pro-B-type natriuretic peptide. Adjusted for baseline values of the exposures.

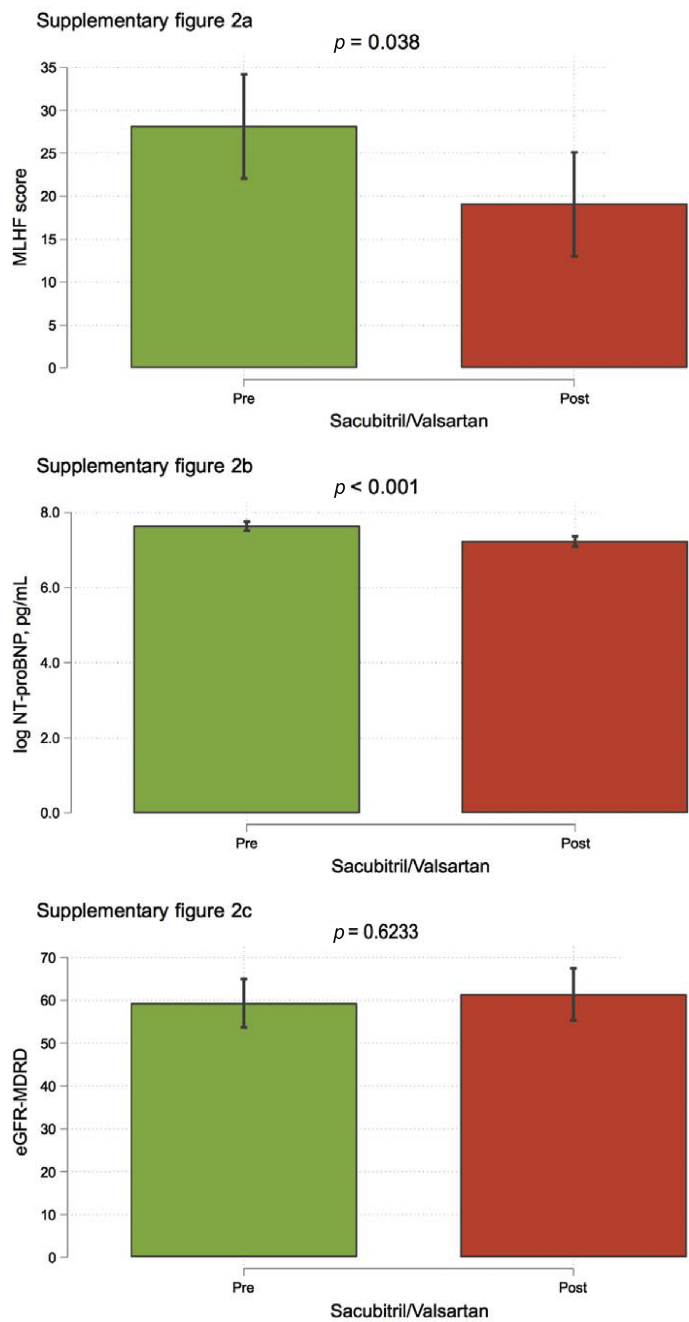

Supplement: mmc1 [file S1885585717305960:mmc1.pdf]
